# Supplementary material
Source: PubMed Central journal article supplement (PMC3448283)
Supplement: NIHMS403961-supplement-01.pdf [file NIHMS403961-supplement-01.pdf]

# THE LANCET Oncology

## Supplementary appendix

This appendix formed part of the original submission and has been peer reviewed. We post it as supplied by the authors.

Supplement to: Mattano LA Jr, Devidas M, Nachman JB, et al, on behalf of the Children's Oncology Group . Effect of alternate-week versus continuous dexamethasone scheduling on the risk of osteonecrosis in paediatric patients with acute lymphoblastic leukaemia: results from the CCG-1961 randomised cohort trial. *Lancet Oncol* 2012; published online Aug 15. [http://dx.doi.org/10.1016/S1470-2045\(12\)70274-7](http://dx.doi.org/10.1016/S1470-2045(12)70274-7).

## SUPPLEMENTAL APPENDIX

### Effect of alternate-week versus continuous dexamethasone scheduling on the risk of osteonecrosis in paediatric patients with acute lymphoblastic leukaemia: results from the CCG-1961 randomised cohort trial

**Supplemental Table 1: Distribution of patients by age, sex, and chemotherapy regimen**

| Age* (years) | # Patients (%) | RER Regimens                |                             |                                |                                | SER Regimens                   |
|--------------|----------------|-----------------------------|-----------------------------|--------------------------------|--------------------------------|--------------------------------|
|              |                | Standard Rx<br>Single IM/DI | Standard Rx<br>Double IM/DI | Intensified Rx<br>Single IM/DI | Intensified Rx<br>Double IM/DI | Intensified Rx<br>Double IM/DI |
| 1-21         | 2056 (100)     | 325 (16)                    | 325 (16)                    | 327 (16)                       | 324 (16)                       | 450 (22)                       |
| Boys         | 1228 (60)      | 197 (61)                    | 196 (60)                    | 179 (55)                       | 188 (58)                       | 275 (61)                       |
| Girls        | 828 (40)       | 128 (39)                    | 129 (40)                    | 148 (45)                       | 136 (42)                       | 175 (39)                       |
| 10-21        | 1287 (63)      | 202 (62)                    | 199 (61)                    | 201 (62)                       | 221 (68)                       | 271 (60)                       |
| Boys         | 762 (59)       | 117 (58)                    | 115 (58)                    | 114 (57)                       | 127 (58)                       | 160 (59)                       |
| Girls        | 525 (41)       | 85 (42)                     | 84 (42)                     | 87 (43)                        | 94 (42)                        | 111 (41)                       |
| 1-9          | 769 (37)       | 123 (38)                    | 126 (39)                    | 126 (39)                       | 103 (32)                       | 179 (40)                       |
| Boys         | 466 (61)       | 80 (65)                     | 81 (64)                     | 65 (52)                        | 61 (59)                        | 115 (64)                       |
| Girls        | 303 (39)       | 43 (35)                     | 45 (36)                     | 61 (48)                        | 42 (41)                        | 64 (36)                        |
| 10-15        | 1025 (50)      | 165 (51)                    | 160 (49)                    | 159 (49)                       | 176 (54)                       | 216 (48)                       |
| Boys         | 590 (58)       | 92 (56)                     | 90 (56)                     | 83 (52)                        | 100 (57)                       | 122 (57)                       |
| Girls        | 435 (42)       | 73 (44)                     | 70 (44)                     | 76 (48)                        | 76 (43)                        | 94 (43)                        |
| 16-21        | 262 (13)       | 37 (11)                     | 39 (12)                     | 42 (13)                        | 45 (14)                        | 55 (12)                        |
| Boys         | 172 (66)       | 25 (68)                     | 25 (64)                     | 31 (74)                        | 27 (60)                        | 38 (69)                        |
| Girls        | 90 (34)        | 12 (32)                     | 14 (36)                     | 11 (26)                        | 18 (40)                        | 17 (31)                        |

\*Age at ALL diagnosis

#### Legend

RER = rapid early response, SER = slow early response

DI = delayed intensification, IM = interim maintenance

Rx = treatment

**Supplemental Table 2: Standard and Intensified Post-Induction Treatment for Rapid Early Responders**

| STANDARD POST-INDUCTION TREATMENT<br>Regimens A & B |                                                                               | INTENSIFIED POST-INDUCTION TREATMENT<br>Regimens C & D |                                                                                                     |
|-----------------------------------------------------|-------------------------------------------------------------------------------|--------------------------------------------------------|-----------------------------------------------------------------------------------------------------|
| Phase and treatment                                 | Dose                                                                          | Phase and treatment                                    | Dose                                                                                                |
| Consolidation (5 wks)                               |                                                                               | Consolidation (9 wks)                                  |                                                                                                     |
| Cyclophosphamide                                    | 1000 mg/m <sup>2</sup> /d IV; d 0,14                                          | Cyclophosphamide                                       | 1000 mg/m <sup>2</sup> /d IV; d 0,28                                                                |
| Cytarabine                                          | 75 mg/m <sup>2</sup> /d SQ or IV; □ d 1-4,8-11,15-18,22-25                    | Cytarabine                                             | 75mg/m <sup>2</sup> /d SQ or IV; □ d 1-4,8-11,29-32,36-39                                           |
| Mercaptopurine                                      | 60 mg/m <sup>2</sup> /d PO; d 0-27                                            | Mercaptopurine                                         | 60 mg/m <sup>2</sup> /d PO; d 0-13,28-41                                                            |
| Methotrexate                                        | IT*; d 0,7,14,21                                                              | Methotrexate                                           | IT*; d 0,7,14,21                                                                                    |
|                                                     |                                                                               | Pegaspargase                                           | 2500 IU/m <sup>2</sup> /d IM; d 14,42                                                               |
|                                                     |                                                                               | Vincristine                                            | 1.5 mg/m <sup>2</sup> /d IV; d 14,21,42,49                                                          |
| Interim Maintenance I□(8 wks)                       |                                                                               | Interim Maintenance I□(8 wks)                          |                                                                                                     |
| Mercaptopurine                                      | 60 mg/m <sup>2</sup> /d PO; d 0-41                                            | Vincristine                                            | 1.5 mg/m <sup>2</sup> /d IV; □ d 0,10,20,30,40                                                      |
| Methotrexate                                        | 15 mg/m <sup>2</sup> /d PO; d 7,14,21,35                                      | Methotrexate                                           | 100 mg/m <sup>2</sup> /d IV; d 0,10,20,30,40<br>Escalate by 50 mg/m <sup>2</sup> /dose as tolerated |
| Methotrexate                                        | IT*; d 0,28                                                                   | Pegaspargase                                           | 2500 IU/m <sup>2</sup> /d IM; d 1,21                                                                |
|                                                     |                                                                               | Methotrexate                                           | IT*; d 0,30                                                                                         |
| Delayed Intensification I□(7 wks)                   |                                                                               | Delayed Intensification I□(8 wks)                      |                                                                                                     |
| Dexamethasone                                       | 10 mg/m <sup>2</sup> /d ÷ BID PO<br>Single DI: d0-20<br>Double DI: d0-6,14-20 | Dexamethasone                                          | 10 mg/m <sup>2</sup> /d ÷ BID PO<br>Single DI: d0-20<br>Double DI: d0-6,14-20                       |
| Vincristine                                         | 1.5 mg/m <sup>2</sup> /d IV; d 0,7,14                                         | Vincristine                                            | 1.5 mg/m <sup>2</sup> /d IV; d 0,7,14                                                               |
| Doxorubicin                                         | 25 mg/m <sup>2</sup> /d IV; d 0,7,14                                          | Doxorubicin                                            | 25 mg/m <sup>2</sup> /d IV; d 0,7,14                                                                |
| Asparaginase                                        | 6000 IU/m <sup>2</sup> /d IM; □ d 3,5,7,10,12,14                              | Pegaspargase                                           | 2500 IU/m <sup>2</sup> /d IM; d 3                                                                   |
| Methotrexate                                        | IT*; d 0                                                                      | Methotrexate                                           | IT*; d 0                                                                                            |
| Cyclophosphamide                                    | 1000 mg/m <sup>2</sup> /d IV; d 28                                            | Cyclophosphamide                                       | 1000 mg/m <sup>2</sup> /d IV; d 28                                                                  |
| Thioguanine                                         | 60 mg/m <sup>2</sup> /d PO; d 28-41                                           | Thioguanine                                            | 60 mg/m <sup>2</sup> /d PO; d 28-41                                                                 |
| Cytarabine                                          | 75 mg/m <sup>2</sup> /d SQ or IV; □ d 29-32,36-39                             | Cytarabine                                             | 75 mg/m <sup>2</sup> /d SQ or IV; □ d 29-32,36-39                                                   |
| Methotrexate                                        | IT*; d 28,35                                                                  | Vincristine                                            | 1.5 mg/m <sup>2</sup> /d IV; d 42,49                                                                |
|                                                     |                                                                               | Pegaspargase                                           | 2500 IU/m <sup>2</sup> /d IM; d 42                                                                  |
|                                                     |                                                                               | Methotrexate                                           | IT*; d 28,35                                                                                        |
| Interim Maintenance II□(8 wks)                      | Regimen B only<br>Same as Interim Maintenance I                               | Interim Maintenance II□(8 wks)                         | Regimen D only<br>Same as Interim Maintenance I                                                     |
| Delayed Intensification II (7 wks)                  | Regimen B only<br>Same as Delayed Intensification I                           | Delayed Intensification II (8 wks)                     | Regimen D only<br>Same as Delayed Intensification I                                                 |
| Maintenance□(12 wks)†                               |                                                                               | Maintenance□(12 wks) †                                 |                                                                                                     |
| Vincristine                                         | 1.5 mg/m <sup>2</sup> /d IV; d 0,28,56                                        | Vincristine                                            | 1.5 mg/m <sup>2</sup> /d IV; d 0,28,56                                                              |
| Prednisone                                          | 40 mg/m <sup>2</sup> /d ÷ BID PO; □ d 0-4,28-32,56-60                         | Prednisone                                             | 40 mg/m <sup>2</sup> /d ÷ BID PO; □ d 0-4,28-32,56-60                                               |
| Mercaptopurine                                      | 75 mg/m <sup>2</sup> /d PO; d 0-83                                            | Mercaptopurine                                         | 75 mg/m <sup>2</sup> /d PO; d 0-83                                                                  |
| Methotrexate                                        | 20 mg/m <sup>2</sup> /d PO<br>d 7,14,21,28,35,42,49,56,63,70,77               | Methotrexate                                           | 20 mg/m <sup>2</sup> /d PO<br>d 7,14,21,28,35,42,49,56,63,70,77                                     |
| Methotrexate                                        | IT*; d 0<br>Single DI/IM: also d 28 in cycles 1-4                             | Methotrexate                                           | IT*; d 0<br>Single DI/IM: also d 28 in cycles 1-4                                                   |

\* Age-adjusted dose: 1-1.9 years 8 mg; 2-2.9 years 10 mg; ≥3 years 12 mg

† Cycles were repeated until the total duration of therapy, beginning with the first interim maintenance period, reached two years for girls and three years for boys.

**Legend**

DI = delayed intensification, IM = interim maintenance

IM = intramuscular, IT = intrathecal, IV = intravenous, PO = oral, SQ = subcutaneous

BID = twice daily, d = day(s), wks = weeks, IU = international units

**Supplemental Table 3: Distribution of osteonecrosis RER patients by age, sex, and chemotherapy regimen**

| Age (years) | Reg A (#)<br>ON / Total | Reg B (#)<br>ON / Total | Reg C (#)<br>ON / Total | Reg D (#)<br>ON / Total | RER (#)<br>ON / Total | Standard (#)<br>ON / Total | Intensified (#)<br>ON / Total |
|-------------|-------------------------|-------------------------|-------------------------|-------------------------|-----------------------|----------------------------|-------------------------------|
| 1-21        | 24 / 325                | 20 / 325                | 43 / 327                | 16 / 324                | 103 / 1301            | 67 / 652                   | 36 / 649                      |
| 10-21       | 23 / 202                | 20 / 199                | 41 / 201                | 14 / 221                | 98 / 823              | 64 / 403                   | 34 / 420                      |
| Girls       | 13 / 85                 | 13 / 84                 | 19 / 87                 | 6 / 94                  | 51 / 350              | 32 / 172                   | 19 / 178                      |
| Boys        | 10 / 117                | 7 / 115                 | 22 / 114                | 8 / 127                 | 47 / 473              | 32 / 231                   | 15 / 242                      |
| 10-15       | 11 / 165                | 14 / 160                | 26 / 159                | 11 / 176                | 62 / 660              | 37 / 324                   | 25 / 336                      |
| Girls       | 7 / 73                  | 9 / 70                  | 16 / 76                 | 5 / 76                  | 37 / 295              | 23 / 149                   | 14 / 147                      |
| Boys        | 4 / 92                  | 5 / 90                  | 10 / 83                 | 6 / 100                 | 25 / 365              | 14 / 174                   | 11 / 190                      |
| 16-21       | 12 / 37                 | 6 / 39                  | 15 / 42                 | 3 / 45                  | 36 / 163              | 27 / 79                    | 9 / 84                        |
| Girls       | 6 / 12                  | 4 / 14                  | 3 / 11                  | 1 / 18                  | 14 / 55               | 9 / 23                     | 5 / 32                        |
| Boys        | 6 / 25                  | 2 / 25                  | 12 / 31                 | 2 / 27                  | 22 / 108              | 18 / 56                    | 4 / 53                        |

**Legend**

RER = rapid early response

Reg = regimen

ON = osteonecrosis
